# Supplementary material for: Emission wavelength variation with changes in excitation in a Re(i)–bisthiazole ligand complex that breaks the Kasha–Vavilov rule
Source: Royal Society of Chemistry journal article supplement (doi:10.1039/c3sc22070b), 2013-01-01
Supplement: c3sc22070b.pdf [file c3sc22070b.pdf]

# Emission wavelength variation with changes in excitation in a Re(I)/ bisthiazole ligand complex that breaks the Kasha-Vavilov rule

Kelly E. Henry,<sup>a</sup> Rebeca G. Balasingham,<sup>b</sup> Anthony R. Vortherms,<sup>a</sup> James A. Platts,<sup>b</sup> John F. Valliant,<sup>c</sup> Michael P. Coogan,<sup>d\*</sup> Jon Zubieta<sup>a\*</sup> and Robert P. Doyle<sup>a\*</sup>

## Supplementary Materials

### Table of Contents

#### 1. Experimental

- 1.1 Materials and Instrumentation
- 1.2 Synthesis of Ligand (**3**)
- 1.3 Synthesis of Rhenium tris-carbonyl starting salt (**5**)
- 1.4 Synthesis of complex (**3'**)

#### 2. Characterization

- 2.1 Characterization of (**3**)
- 2.2 Characterization of (**5**)
- 2.3 Additional photophysical data for (**3'**)

#### 1. Experimental

##### *1.1 Materials and Instrumentation*

All chemicals, reagents, and solvents were purchased from Sigma-Aldrich, Alfa Aesar, or Fisher Scientific (USA) and used without further purification. An Agilent 1200 reverse-phase High-Performance Liquid Chromatography (HPLC) instrument with a manual injector and automated fraction collector was used for all purifications. An Eclipse C18 XBD analytical column (5  $\mu\text{m}$  x 4.6 mm x 150 mm) was used for all purifications. All methods were run at a flow rate of 1 mL $\cdot$ min<sup>-1</sup> at a UV detection of 254 nm. <sup>1</sup>H-NMR spectroscopy was conducted using a Bruker Advance DPX 500 MHz spectrometer. Mass

spectra were obtained using a Bruker Autoflex III Matrix-Assisted Laser Desorption/Ionization Time of Flight Mass Spectrometer (MALDI-ToF MS) or a Shimadzu 2000 Electrospray Ionization Mass Spectrometer (ESI-MS). Electron absorption spectra (EAS) were obtained using a Cary 50 UV-Vis spectrophotometer. Fluorescence spectra were obtained using a FluoroMax-4 spectrofluorimeter in HPLC-grade solvents, or on a JobinYvon-Horiba Fluorolog spectrometer fitted with a JY TBX picosecond photodetection module, with automatic correction of spectra for variations in instrument sensitivity with wavelength using the DataStation suite of software. Steady state spectra were recorded using a CW xenon excitation lamp with a single monochromator with excitation slits set to 2 nm. The sample chamber was arranged for orthogonal detection with 1 cm quartz cuvettes. Emitted light was passed through a single monochromator with emission slits set between 2 and 6 nm, and recorded on a 1911F emission signal detector. Luminescence lifetimes were obtained using either 295 nm or 372 nm nanoLEDs operating at 1 MHz. All lifetime data were collected using the JY-Horiba FluoroHub single photon counting module in multi-channel scaler mode and lifetimes determined using the provided decay analysis software package, DAS v6.1. Quantum yield measurements were obtained with aerated acetonitrile solutions, using [Ru(bpy)<sub>3</sub>](PF<sub>6</sub>)<sub>2</sub> (recrystallised from acetone/water mixtures at least three times) in aerated acetonitrile as a standard ( $\Phi_{\text{em}} = 0.016$ ) with manual titration of samples to equal absorbencies and integration of emission areas using the facility provided in the DataStation suite of software.

DFT studies were carried out using Gaussian03<sup>[1]</sup> and Gaussian09<sup>[2]</sup> software. Initial geometry optimisation of **3'** and **N-Me 3'** (in its N,N, N,S and S,S forms) was

performed at the B3LYP/LANL2DZ<sup>[3][4]</sup> level in Gaussian03. Subsequent TD-DFT and energy comparisons also employed B3LYP, this time with a basis set consisting of 6-31+G(d,p)<sup>[5]</sup> on all atoms except Re, for which the Stuttgart-Dresden basis set and effective core potential<sup>[6]</sup> was used. Geometry optimisation and comparison of energy of configurations were done in gas phase, while TD-DFT calculations of absorption and emission energy employed the Polarizable Continuum Model (PCM) approximation of solvents.<sup>[7]</sup>

### *1.2 Synthesis of 1,1-bisthiazole-(1,4)-diaminobutane (3)*

*N*-Boc-1,4-butanediamine (300 mg, 1.5 mmol), and thiazole-4-carboxaldehyde (360 mg, 3.0 mmol) were mixed in anhydrous dichloroethane (DCE) (5.0 mL) under N<sub>2</sub> at room temperature for 30 min. Sodium triacetoxyborohydride (636 mg, 3.0 mmol) was subsequently added to the mixture along with an additional 5 mL of anhydrous DCE and the reaction was stirred for 16 h. After reaction completion, the solvent was removed under vacuum and the product was dissolved in 10% methanol (MeOH), 10% trifluoroacetic acid (TFA) (v/v) in H<sub>2</sub>O and stirred for 3 h. The reaction was purified by reverse-phase HPLC, with a gradient of 100% 0.1% TFA in H<sub>2</sub>O increased to 20% acetonitrile (MeCN) over 5 minutes, and increased to 40% MeCN over 2.5 minutes, and increased to 100% MeCN over 2.5 minutes. Yield is 10% at >95% purity, <sup>1</sup>H-NMR (500 MHz) D<sub>2</sub>O: δ = 9.05 (s, 2H), δ = 7.81 (s, 2H), δ = 4.54 (s, 4H), δ = 3.28 (t, 2H), δ = 2.98 (t, 2H), δ = 1.87 (m, 2H), δ = 1.63 (m, 2H)

### *1.3 Synthesis of Re(H<sub>2</sub>O)<sub>3</sub>(CO)<sub>3</sub>Br (5)*

$\text{Re}(\text{CO})_5\text{Br}$  (9 g, 22.0 mmol) was dissolved in 100 mL  $\text{dH}_2\text{O}$  and refluxed at  $>100^\circ\text{C}$  for 24 h. The crude mixture was cooled to room temperature and filtered through a plug of Celite and the resulting product was concentrated under vacuum to give a light green powder. Yield was 90%.

#### *1.4 Synthesis of $[\text{Re}(\text{CO})_3\text{-}1,1\text{-bisthiazole-(1,4)-diaminobutane}]$ bromide (**3'**)*

$\text{Re}(\text{CO})_3(\text{H}_2\text{O})_3\text{Br}$  (420 mg, 1.04 mmol), and 1,1-bisthiazole-1,4-diaminobutane (294 mg, 1.04 mmol) were refluxed in MeOH at  $>65^\circ\text{C}$  for 3 h. The solvent was reduced under vacuum and dissolved in 10% MeOH, 10% dimethyl sulfoxide (DMSO) (v/v) in  $\text{H}_2\text{O}$ . **3'** was purified by reverse-phase HPLC with a gradient of 95% 0.1 % TFA in  $\text{H}_2\text{O}$  and 5% MeCN increased to 12% MeCN over 7 minutes, then increased to 20% MeCN over 2 minutes, and finally increased to 25% MeCN over 5 minutes. The complex was characterized using MALDI-ToF MS using a 10 mg/mL alpha-cyano-4-hydroxycinnamic acid (CHCA) matrix, dissolved in 50:50 mixture of  $\text{H}_2\text{O}$ :MeCN with 0.1% TFA; **3'** was also characterized using  $^1\text{H}$ -NMR in  $\text{DMSO-}d_6$ . Further characterization was done by EAS and fluorescence spectroscopy. Yield is 5% at  $>99\%$  purity based on HPLC (see Figure S5  $t_{\text{R}} = 13$  min).  $^1\text{H}$ -NMR (500 MHz)  $\text{D}_2\text{O}$ :  $\delta = 10.43$  (d, 2H),  $\delta = 8.61$  (s, 2H),  $\delta = 5.50$  (m, 4H),  $\delta = 3.82$  (t, 2H),  $\delta = 3.51$  (t, 2H),  $\delta = 2.82$  (d, 2H),  $\delta = 2.57$  (t, 2H).

## **2. Characterization**

### *2.1 Characterization of **3***

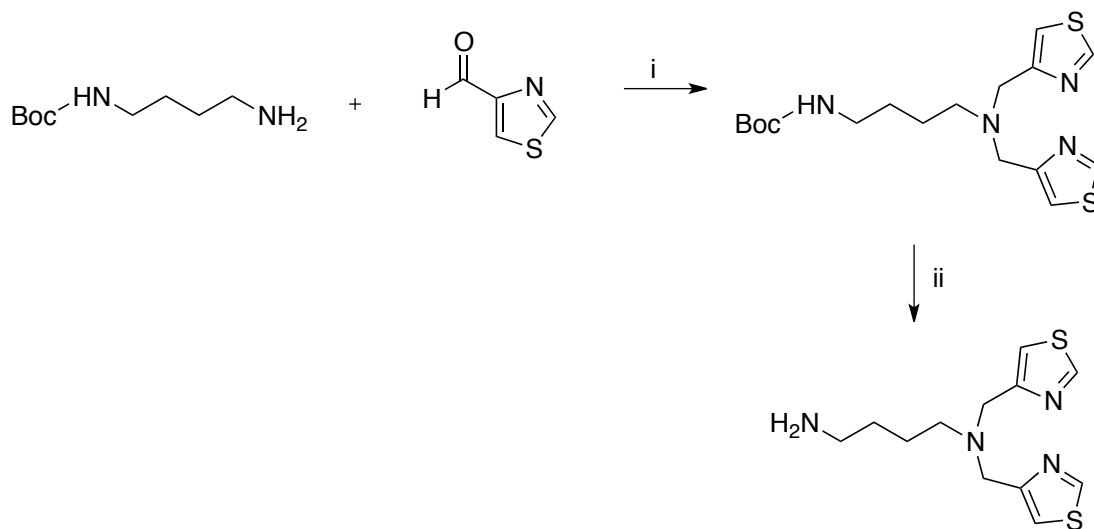

**Scheme S1.** Synthesis of **3**. Reaction conditions i: NaBH(COOCH<sub>3</sub>)<sub>3</sub>, anhydrous DCE, 16 h under N<sub>2</sub>; ii: 10% TFA, 10% MeOH in H<sub>2</sub>O, 3 h.

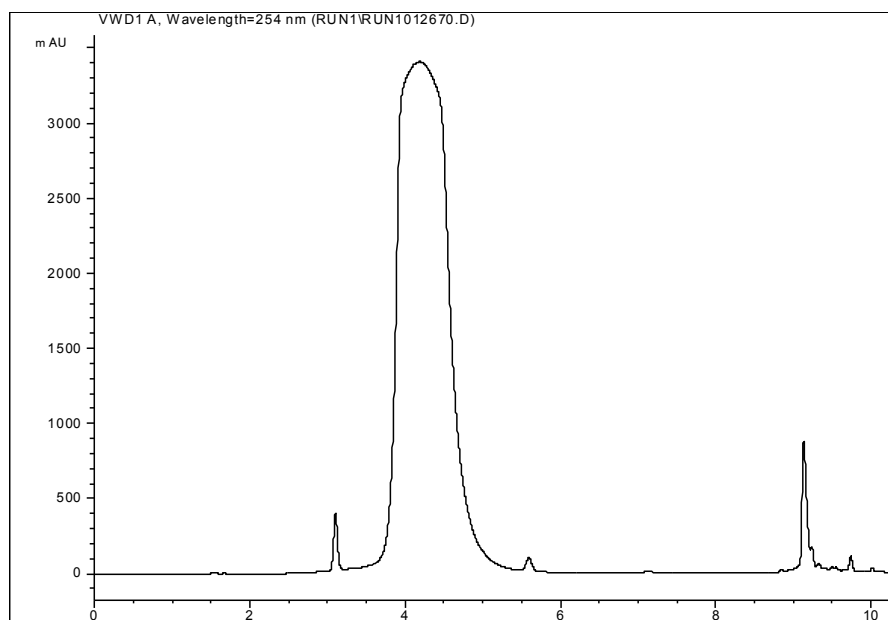

**Figure S1.** HPLC chromatogram of **3**; the peak at *t<sub>R</sub>* 4.3 minutes was isolated and represents **3** as shown by ESI-MS and <sup>1</sup>H-NMR.

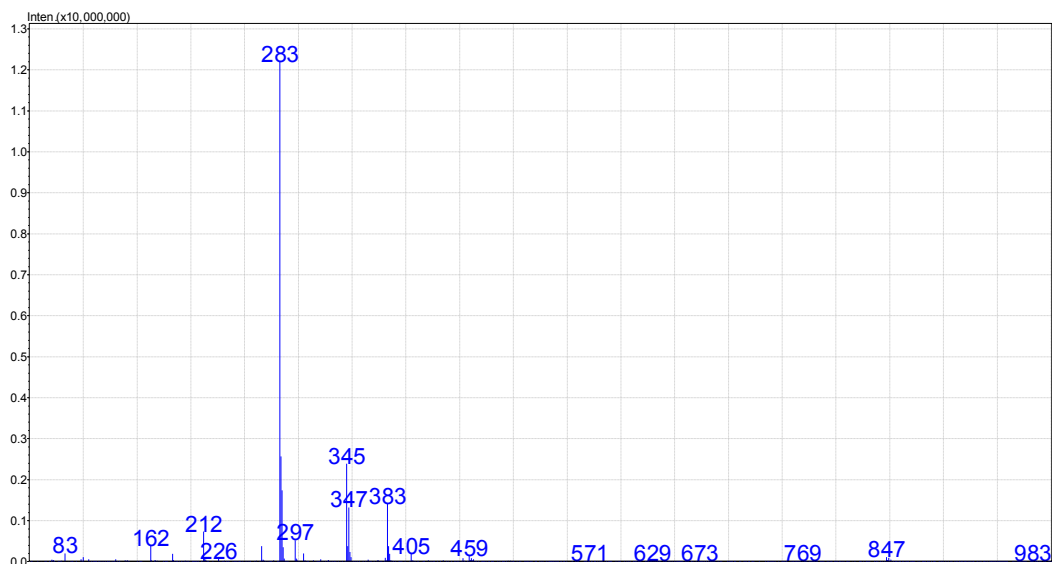

**Figure S2.** ESI-MS of **3**. Peak at 283 represents the predicted  $m/z$  for **3**.

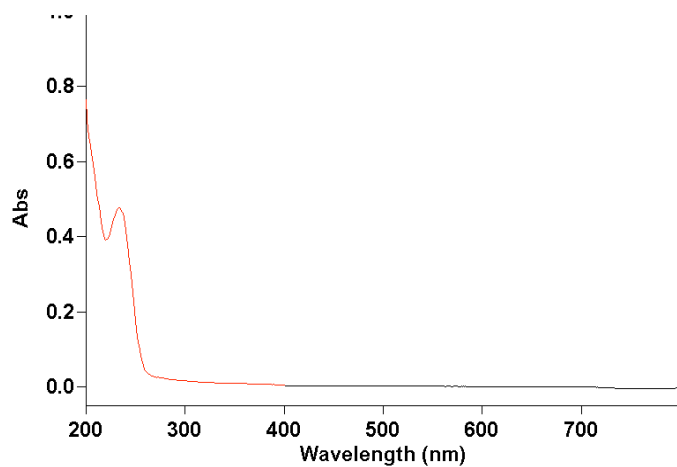

**Figure S3.** Electron absorption spectrum of **3**. The  $\lambda_{\text{max}}$  value is 235 nm.

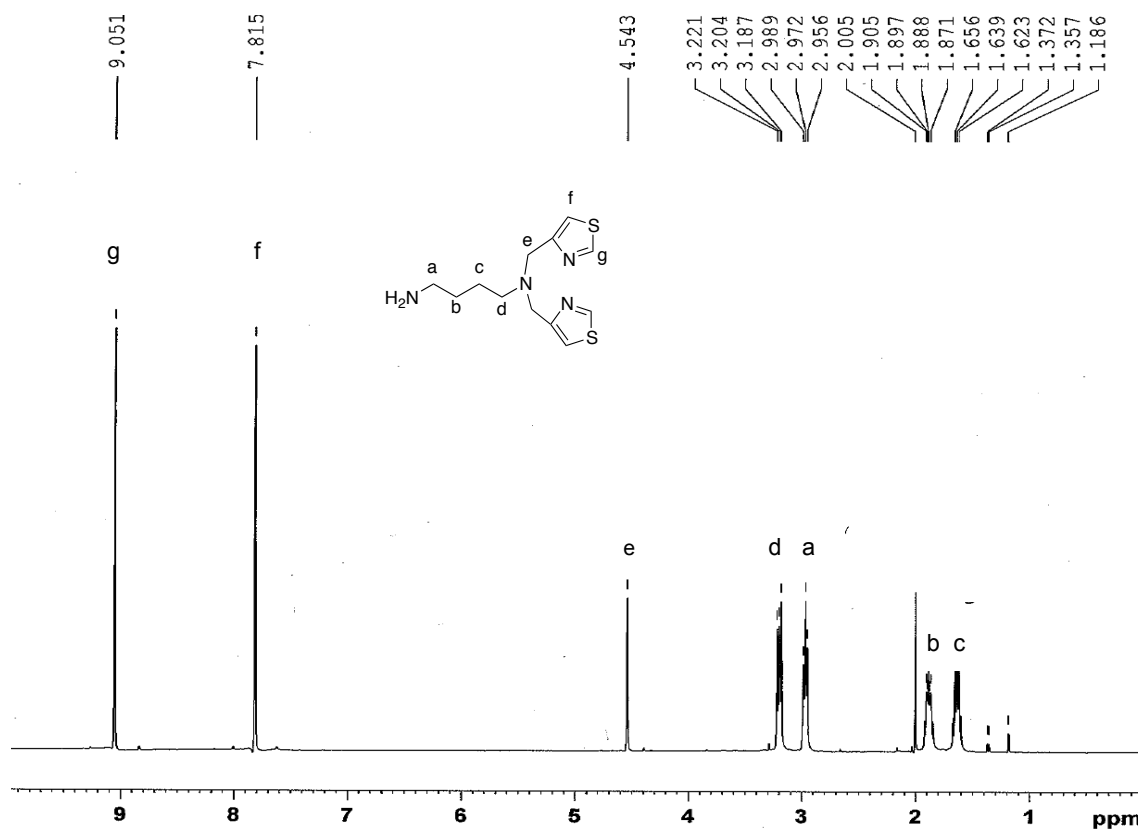

**Figure S4.** <sup>1</sup>H-NMR of **3** in D<sub>2</sub>O.

## 2.2 Characterization of **3'**

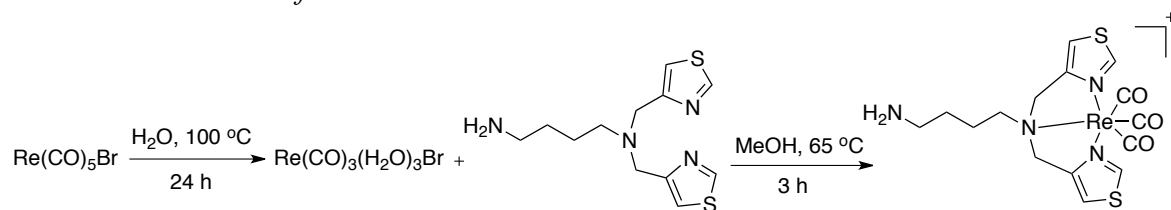

**Scheme S2.** Synthetic route to **3'**.

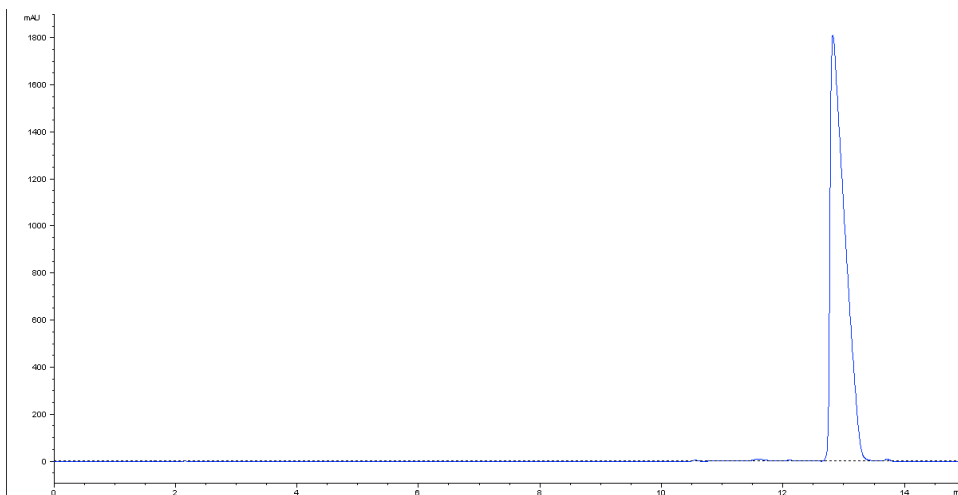

**Figure S5.** Chromatogram of **3'**; the peak at  $t_R$  13 minutes represents complex **3'**. This peak was individually isolated and utilized in all subsequent photophysical studies.

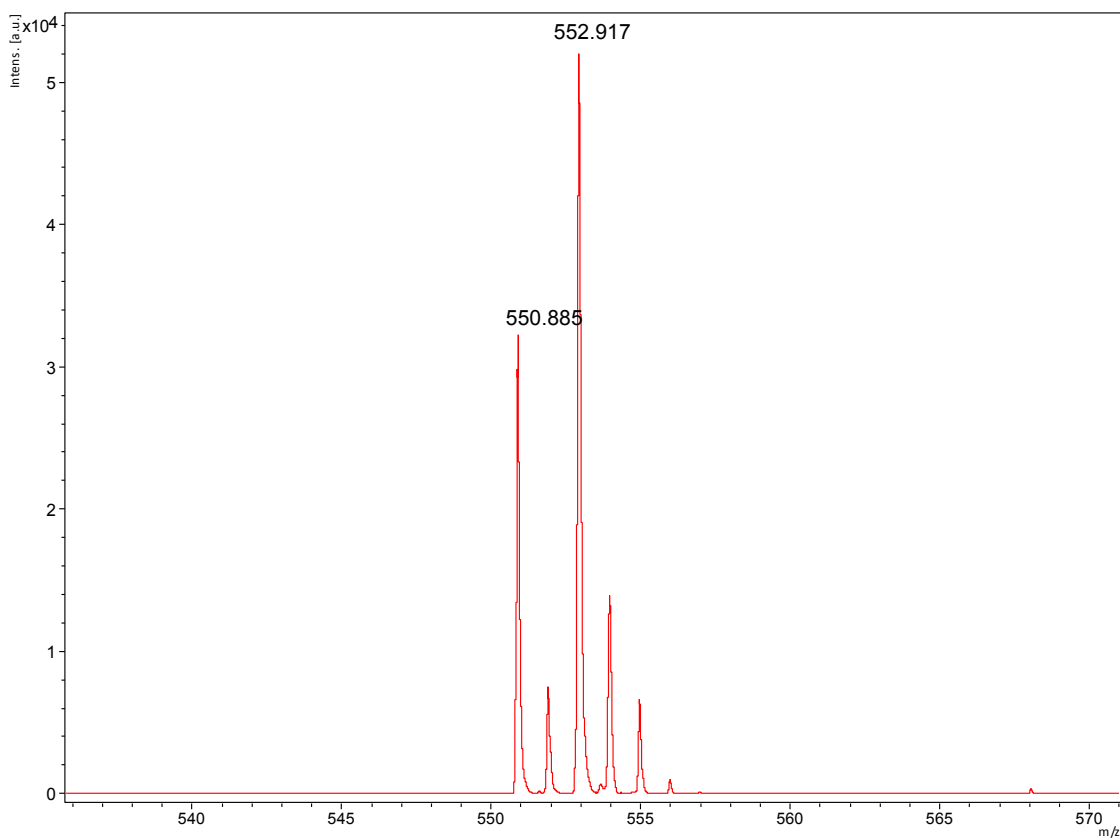

**Figure S6.** MALDI-ToF mass spectrum of **3'**. Peak at  $m/z$  553 showing expected mass of complex **3'**, with the predicted isotopic distribution.



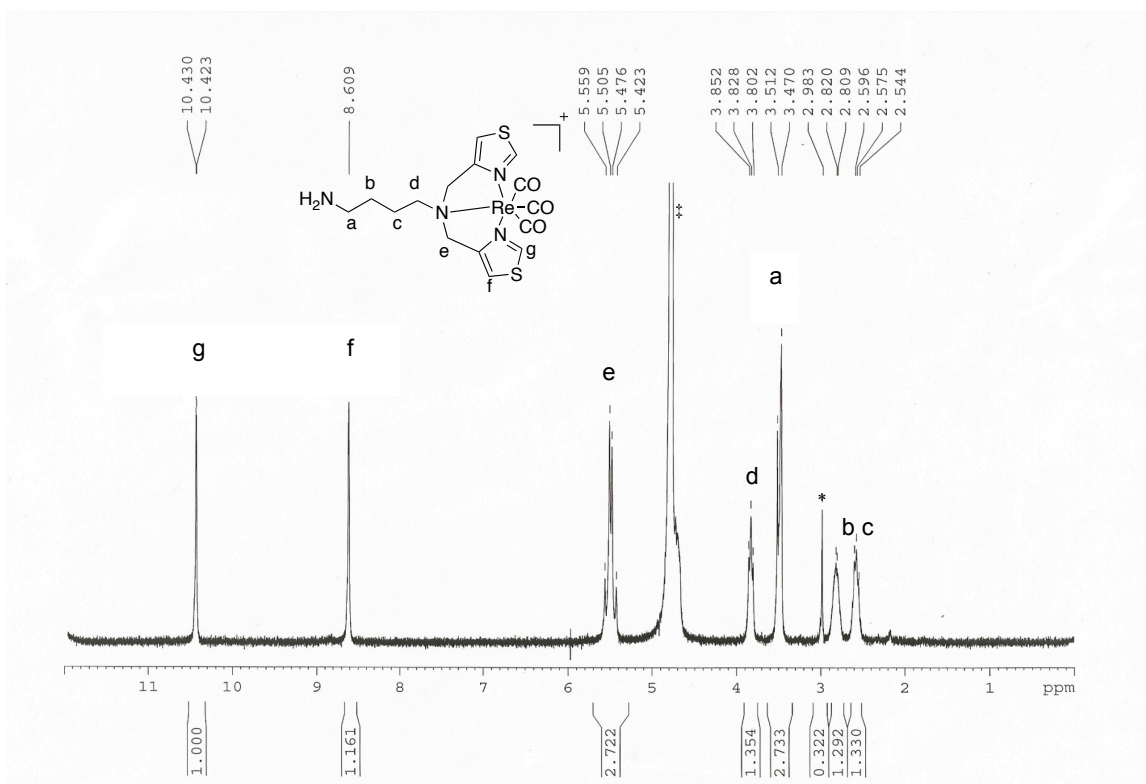

**Figure S7.** <sup>1</sup>H-NMR of **3'** in DMSO-*d*<sub>6</sub>. ‡ represents HDO and \* represents DMSO-Hd<sub>5</sub> present as solvent impurities.

### 2.3 Additional Photophysical Data for **3'**

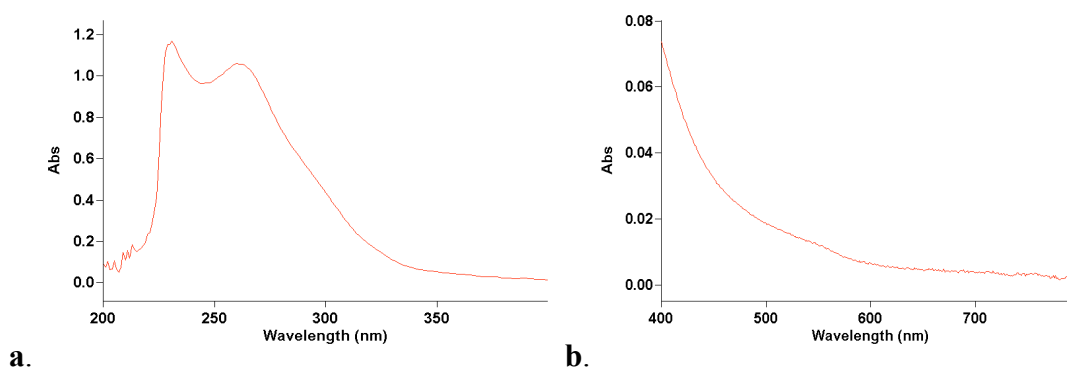

**Figure S8.** Electron absorption spectrum of **3'** in MeOH. Separate scans were ran for the UV (**a**) and the visible (**b**) region.

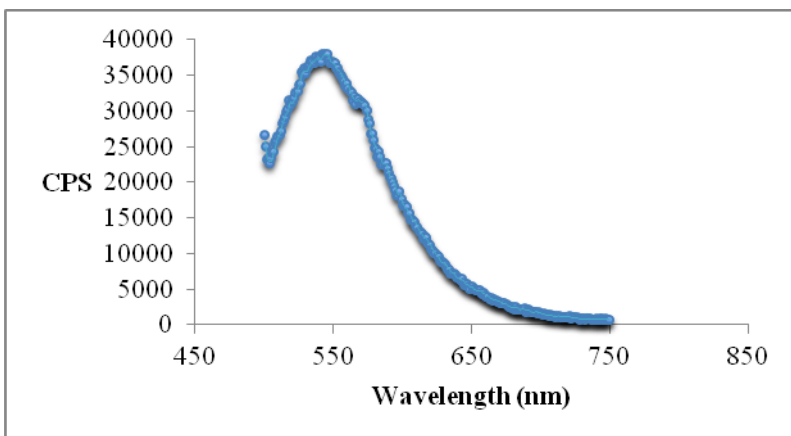

**Figure S9.** Emission spectrum of 3' in MeOH via excitation at 488 nm.

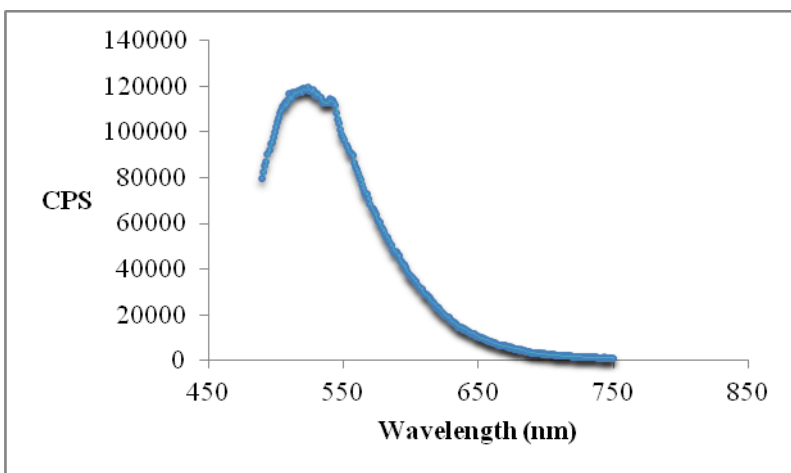

**Figure S10.** Emission spectrum of 3' in MeOH via excitation at 468 nm.

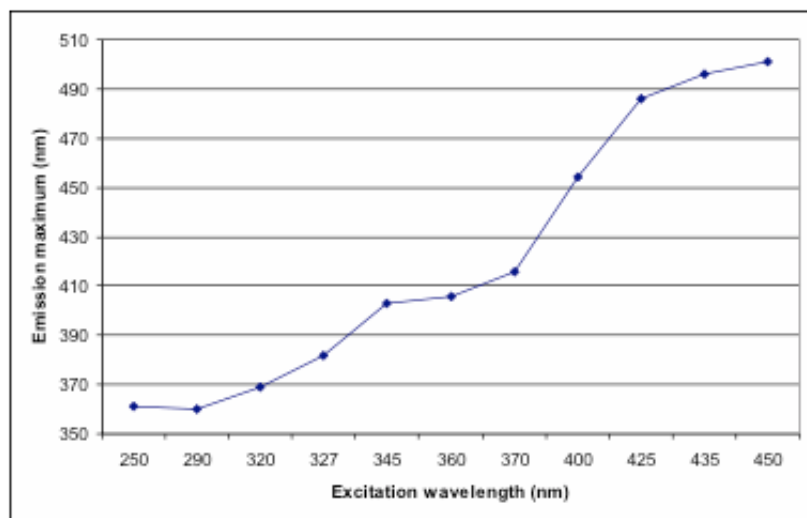

**Figure S11.** Variation of emission maximum of 3' with excitation wavelength (MeOH).

**Table S1.** Excited states of (N-Me 3').

First line reports PCM simulation of acetonitrile, second line methanol, third line dichloromethane.

| No | Multiplicity | $\lambda$ (nm)    | f (au)               | Orbitals <sup>a</sup>            |
|----|--------------|-------------------|----------------------|----------------------------------|
| 1  | Triplet      | 429<br>429<br>433 | 0.00                 | HOMO – LUMO                      |
| 2  | Triplet      | 403<br>403<br>405 | 0.00                 | HOMO – LUMO+1<br>HOMO-3 – LUMO   |
| 3  | Singlet      | 352<br>352<br>357 | 0.11<br>0.10<br>0.11 | HOMO – LUMO                      |
| 4  | Triplet      | 349<br>347<br>347 | 0.00                 | HOMO – LUMO+2<br>HOMO-3 – LUMO+1 |
| 5  | Triplet      | 340<br>340<br>343 | 0.00                 | HOMO-1 – LUMO<br>HOMO – LUMO+1   |
| 6  | Triplet      | 339<br>338<br>339 | 0.00                 | HOMO – LUMO+2                    |
| 7  | Triplet      | 333<br>333<br>335 | 0.00                 | HOMO-1 – LUMO                    |
| 8  | Singlet      | 332<br>332<br>336 | 0.00                 | HOMO-1 – LUMO                    |
| 9  | Singlet      | 328<br>329<br>333 | 0.07<br>0.07<br>0.07 | HOMO – LUMO+1                    |
| 10 | Triplet      | 321<br>321<br>324 | 0.00                 | HOMO-2 – LUMO                    |
| 11 | Singlet      | 318<br>318<br>318 | 0.01<br>0.01<br>0.02 | HOMO – LUMO+2                    |
| 12 | Singlet      | 314<br>314<br>317 | 0.03<br>0.03<br>0.02 | HOMO-2 – LUMO                    |
| 13 | Triplet      | 312<br>312<br>312 | 0.00                 | HOMO-1 – LUMO+2                  |
| 14 | Triplet      | 306<br>307<br>309 | 0.00                 | HOMO-1 – LUMO+1                  |

|    |         |                   |                      |                                    |
|----|---------|-------------------|----------------------|------------------------------------|
| 15 | Triplet | 303<br>303<br>303 | 0.00                 | HOMO – LUMO+3                      |
| 16 | Singlet | 302<br>302<br>306 | 0.01<br>0.01<br>0.01 | HOMO-1 – LUMO+1                    |
| 17 | Triplet | 301<br>301<br>302 | 0.00                 | HOMO-2 – LUMO+2<br>HOMO-1 – LUMO+1 |
| 18 | Triplet | 292<br>292<br>296 | 0.00                 | HOMO-2 – LUMO+1                    |
| 19 | Singlet | 291<br>291<br>294 | 0.00<br>0.00<br>0.01 | HOMO-1 – LUMO+2                    |
| 20 | Triplet | 291<br>290<br>291 | 0.00                 | HOMO – LUMO+4                      |

<sup>a</sup> Dominant contribution(s) are reported

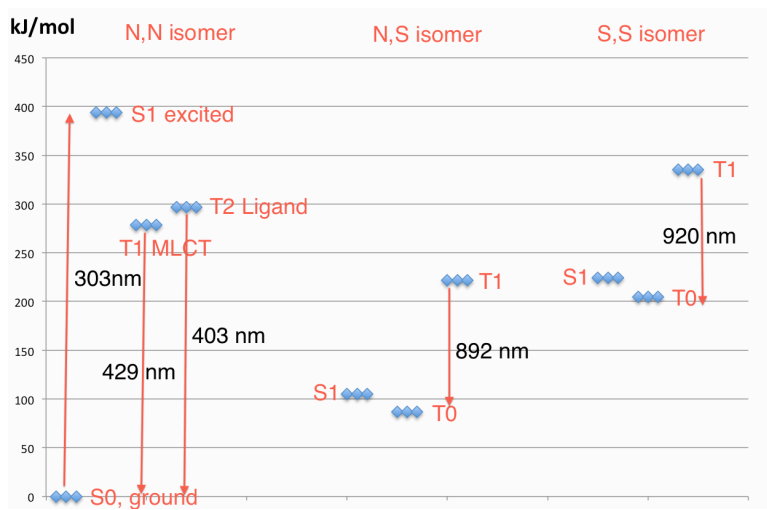

**Figure S12.** Summary of the relative energies of ground and excited states of 3'.

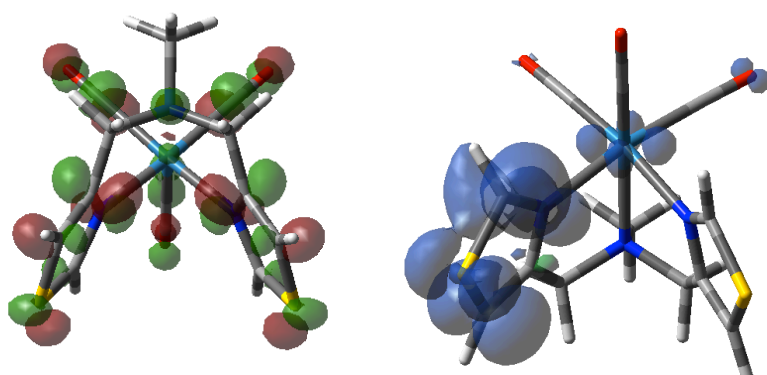

**Figure S13.** LUMO 3+ (left) and spin at triplet.

**Table S2.** Electronic absorption bands of **3'**.

| Wavelength (nm) | Assignment      | A ( $\text{m}^2 \text{mol}^{-1} \times 10^3$ ) |
|-----------------|-----------------|------------------------------------------------|
| 525 (shoulder)  | $^1\text{MLCT}$ | 0.015                                          |
| 262             | $^1\text{IL}$   | 4.5                                            |
| 235             | $^1\text{IL}$   | 4.9                                            |

**Table S3.** Variation of emission maximum as a function of excitation wavelength for **3'**.

| Solvent                                               | DCM                                                  |                                                       |                         | MeCN                                                 |                                                       |                         | MeOH                                                 |                                            |                         |
|-------------------------------------------------------|------------------------------------------------------|-------------------------------------------------------|-------------------------|------------------------------------------------------|-------------------------------------------------------|-------------------------|------------------------------------------------------|--------------------------------------------|-------------------------|
| $\lambda$<br>excitation<br>nm<br>( $\text{cm}^{-1}$ ) | Emission<br>$\lambda$ max nm<br>( $\text{cm}^{-1}$ ) | Position<br>of<br>shoulder<br>(if<br>present)<br>(nm) | Stokes<br>shift<br>(nm) | Emission<br>$\lambda$ max nm<br>( $\text{cm}^{-1}$ ) | Position<br>of<br>shoulder<br>(if<br>present)<br>(nm) | Stokes<br>shift<br>(nm) | Emission<br>$\lambda$ max nm<br>( $\text{cm}^{-1}$ ) | Position of<br>shoulder (if<br>present) nm | Stokes<br>shift<br>(nm) |
| 250<br>(40000)                                        | 361<br>(2770)                                        |                                                       | 111                     | 400<br>(25000)                                       | 356                                                   | 150                     | 399<br>(25062)                                       |                                            | 149                     |
| 290<br>(34482)                                        | 360<br>(2777)                                        |                                                       | 70                      | 345<br>(28985)                                       |                                                       | 55                      | 389<br>(25706)                                       |                                            | 99                      |
| 320<br>(31250)                                        | 369<br>(2710)                                        |                                                       | 49                      | 394<br>(25380)                                       |                                                       | 74                      | 399<br>(25062)                                       |                                            | 79                      |
| 327<br>(30581)                                        | 382<br>(2617)                                        |                                                       | 55                      | 394<br>(25380)                                       |                                                       | 67                      | 399<br>(25062)                                       |                                            | 72                      |
| 345<br>(28985)                                        | 403<br>(2481)                                        | 385                                                   | 58                      | 399<br>(25062)                                       |                                                       | 54                      | 405<br>(24691)                                       | 385                                        | 60                      |
| 360<br>(27777)                                        | 406<br>(2463)                                        | 390                                                   | 46                      | 408<br>(24509)                                       |                                                       | 48                      | 443<br>(22573)                                       | 390                                        | 83                      |
| 370<br>(27027)                                        | 416<br>(2403)                                        | 405                                                   | 46                      | 420<br>(23809)                                       |                                                       | 50                      | 419<br>(23866)                                       | 405                                        | 49                      |
| 400<br>(25000)                                        | 454<br>(2202)                                        | 435                                                   | 54                      | 476<br>(21008)                                       | 458                                                   | 76                      | 485<br>(20618)                                       | 435                                        | 85                      |
| 425<br>(23529)                                        | 486<br>(2057)                                        |                                                       | 61                      | 491<br>(20366)                                       | 473                                                   | 66                      | 529<br>(18903)                                       |                                            | 104                     |
| 435<br>(22988)                                        | 496<br>(2016)                                        | 485                                                   | 61                      | 504<br>(19841)                                       | 485                                                   | 69                      | 543<br>(18416)                                       | 485                                        | 108                     |

|                |               |     |    |                |     |    |                |     |     |
|----------------|---------------|-----|----|----------------|-----|----|----------------|-----|-----|
| 450<br>(22222) | 501<br>(1996) | 525 | 51 | 522<br>(19157) | 502 | 72 | 551<br>(18148) | 525 | 101 |
|----------------|---------------|-----|----|----------------|-----|----|----------------|-----|-----|

**Table S4.** Variation of Quantum Yield as a function of excitation wavelength for **3'**(MeOH).

| Excitation wavelength (nm) | Emission Maximum (nm) | Q (x 10 <sup>3</sup> ) |
|----------------------------|-----------------------|------------------------|
| 320                        | 369                   | 2.9                    |
| 370                        | 416                   | 6.1                    |
| 400                        | 454                   | 3.6                    |

**Table S5.** Variation of lifetime as a function of excitation wavelength for **3'** (MeOH).

| Excitation wavelength (nm) | Emission Detection (nm) | $\tau$ (ns) (major component) |
|----------------------------|-------------------------|-------------------------------|
| 295                        | 370                     | 0.9                           |
| 372                        | 450                     | 4.9                           |

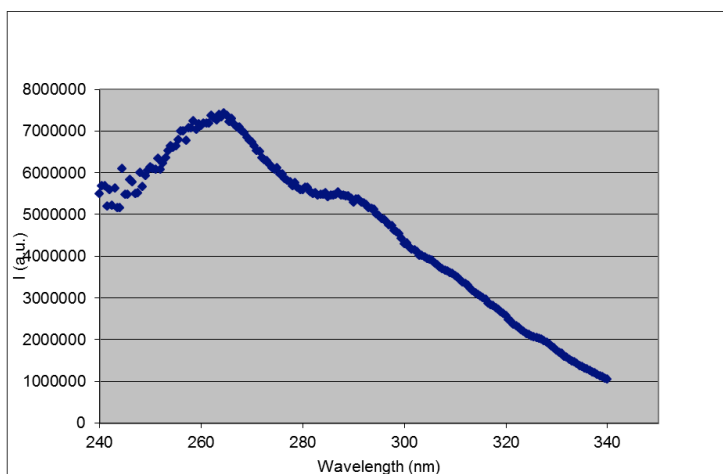

**Figure S14.** Excitation spectrum of **3'** (MeOH). Detection 360 nm.

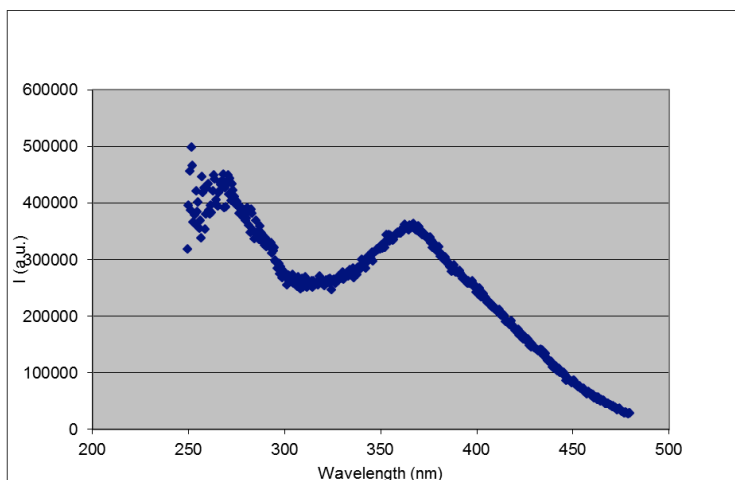

**Figure S15.** Excitation spectrum of **3'** (MeOH). Detection at 500 nm.

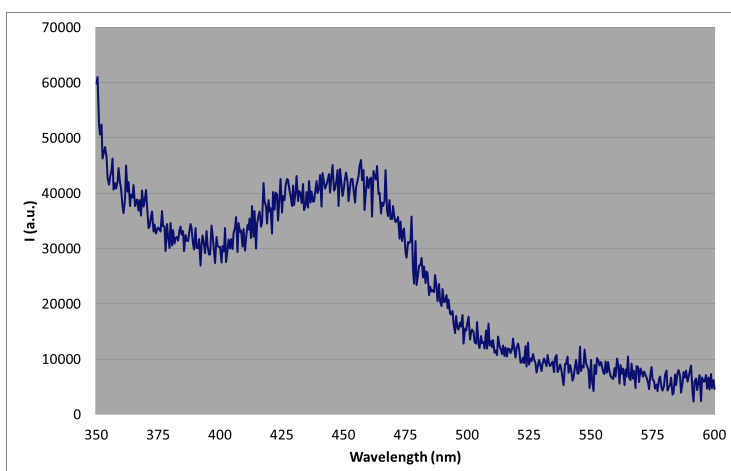

**Figure S16.** Excitation spectrum of **3'** (MeOH). Detection at 688 nm.

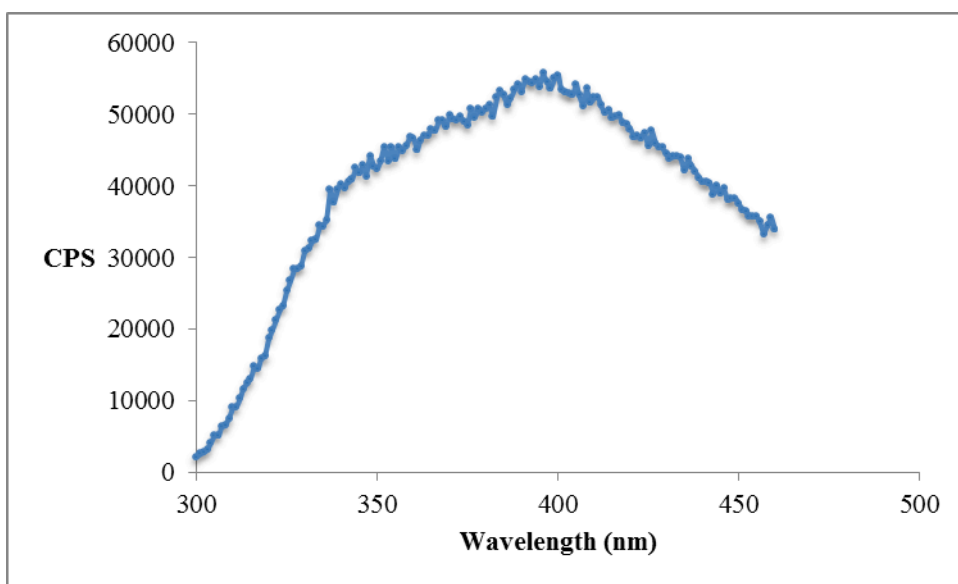

**Figure S17.** Emission spectrum of **3'** via excitation at 250 nm (MeCN).

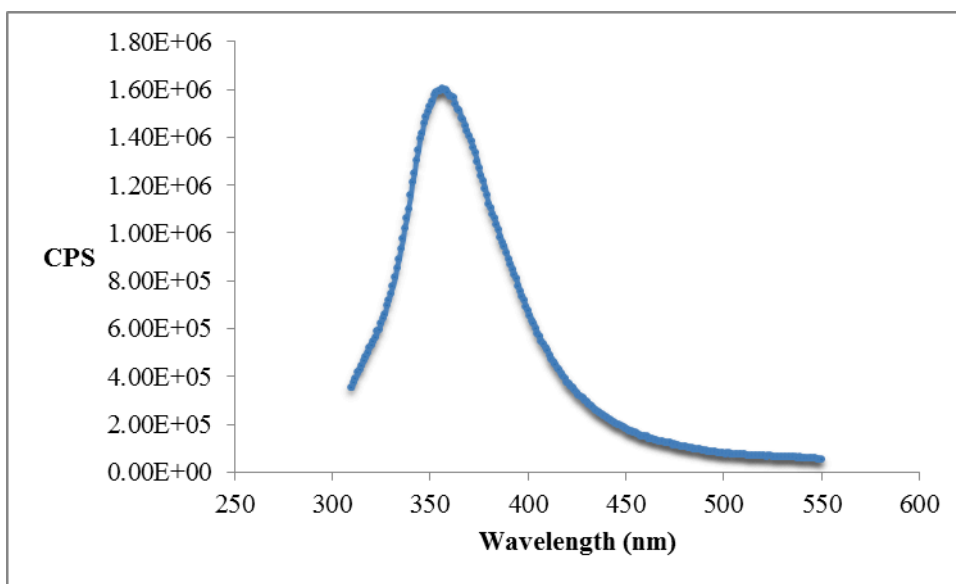

**Figure S18.** Emission spectrum of **3'** via excitation at 290 nm (MeCN).

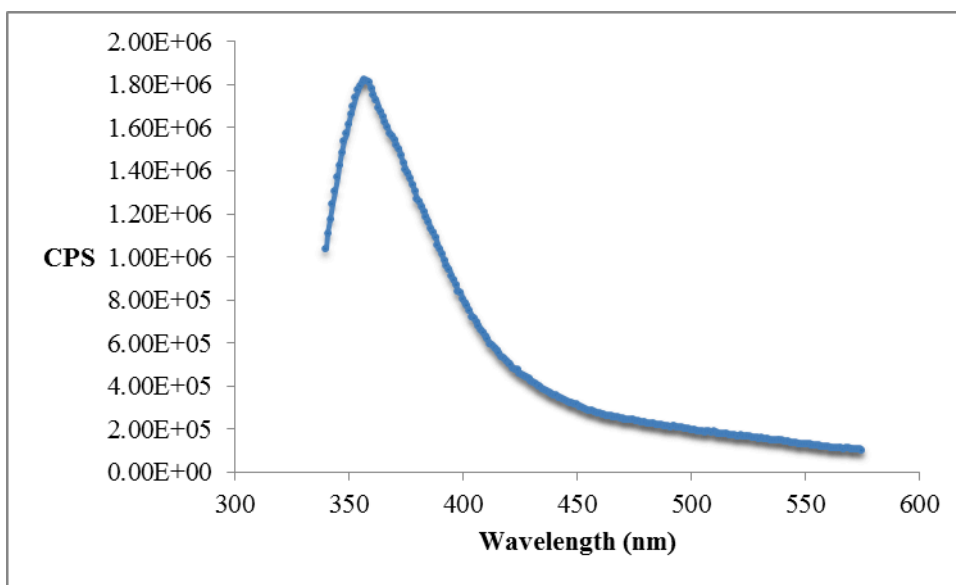

**Figure S19.** Emission spectrum of **3'** via excitation at 320 nm (MeCN).



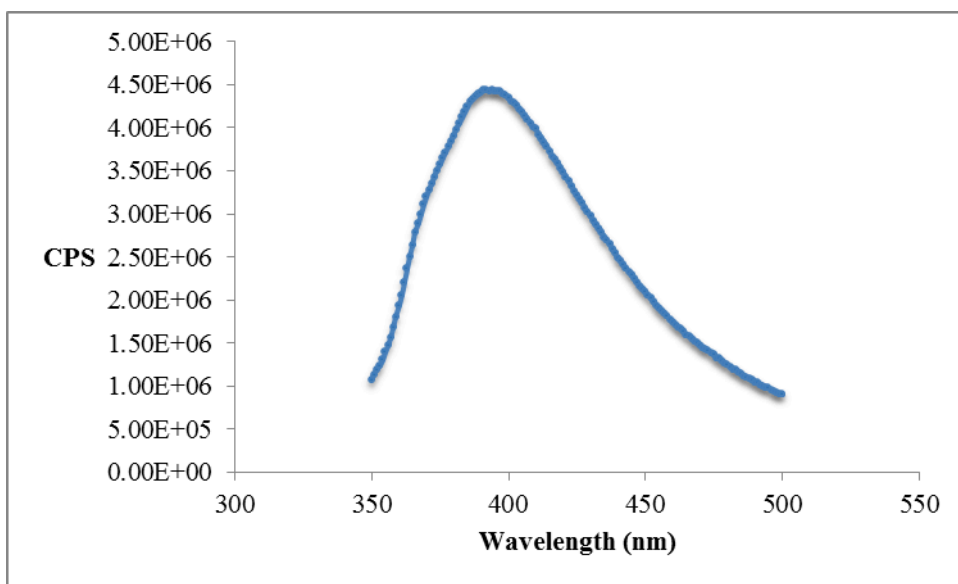

**Figure S20.** Emission spectrum of **3'** via excitation at 327 nm (MeCN).

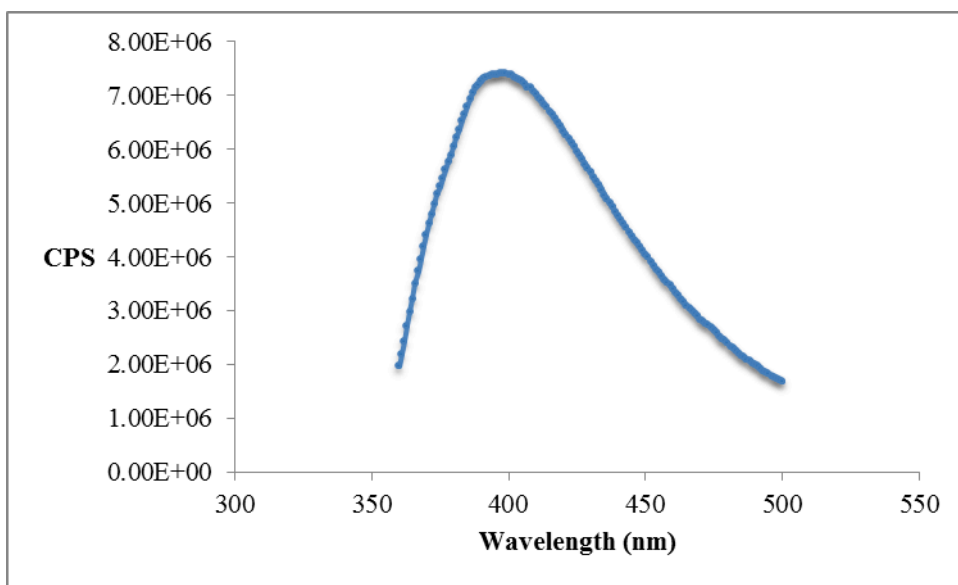

**Figure S21.** Emission spectrum of **3'** via excitation at 345 nm (MeCN).

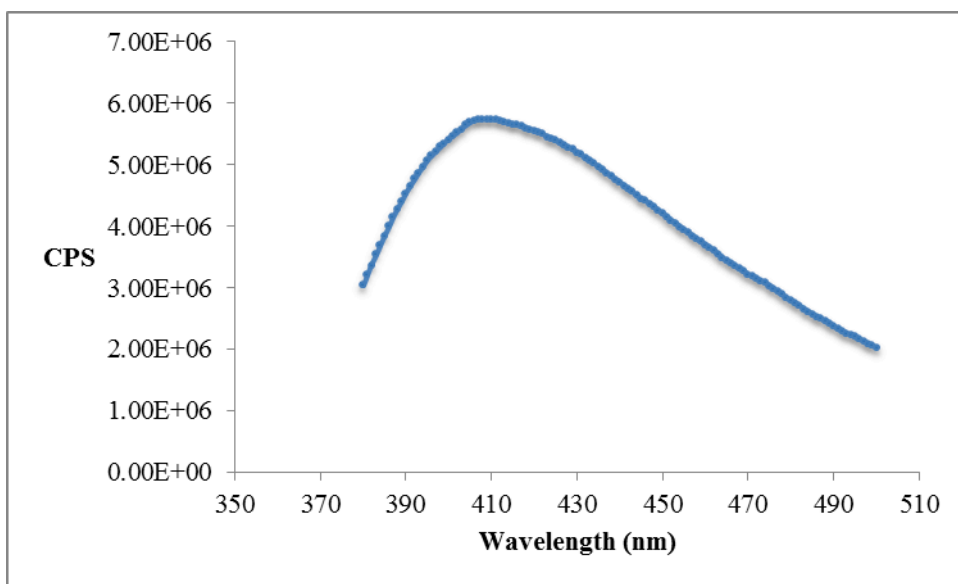

**Figure S22.** Emission spectrum of **3'** via excitation at 360 nm (MeCN).

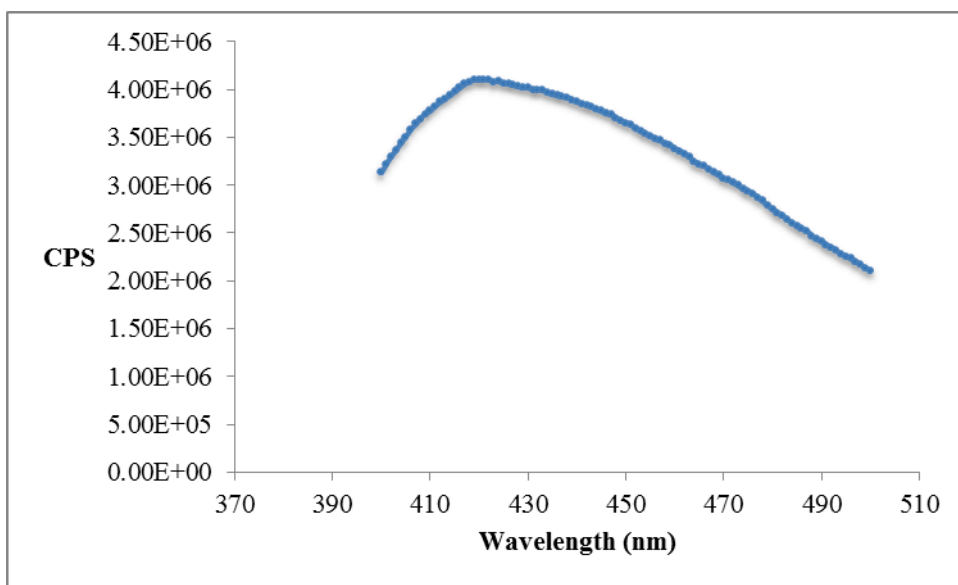

**Figure S23.** Emission spectrum of **3'** via excitation at 370 nm (MeCN).

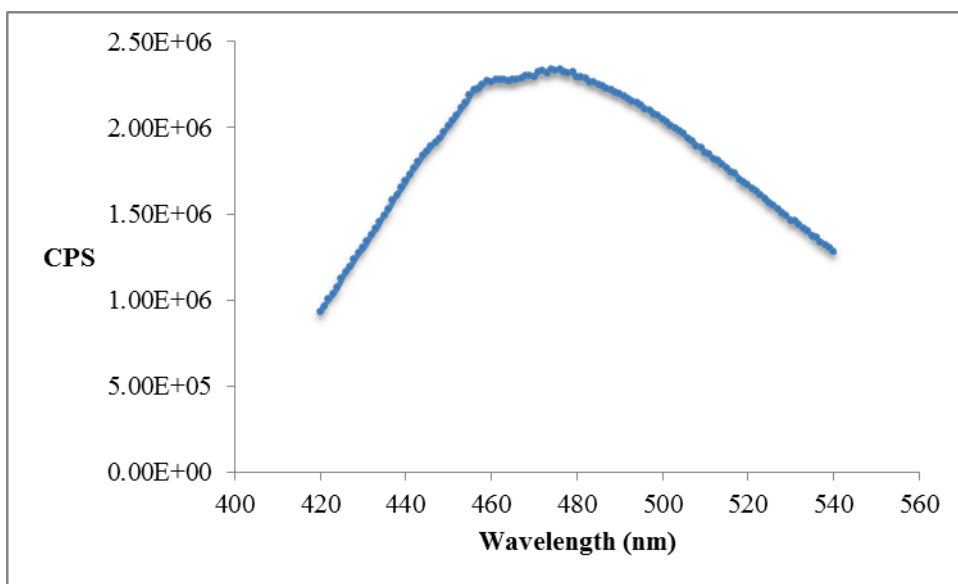

**Figure S24.** Emission spectrum of **3'** via excitation at 400 nm (MeCN).

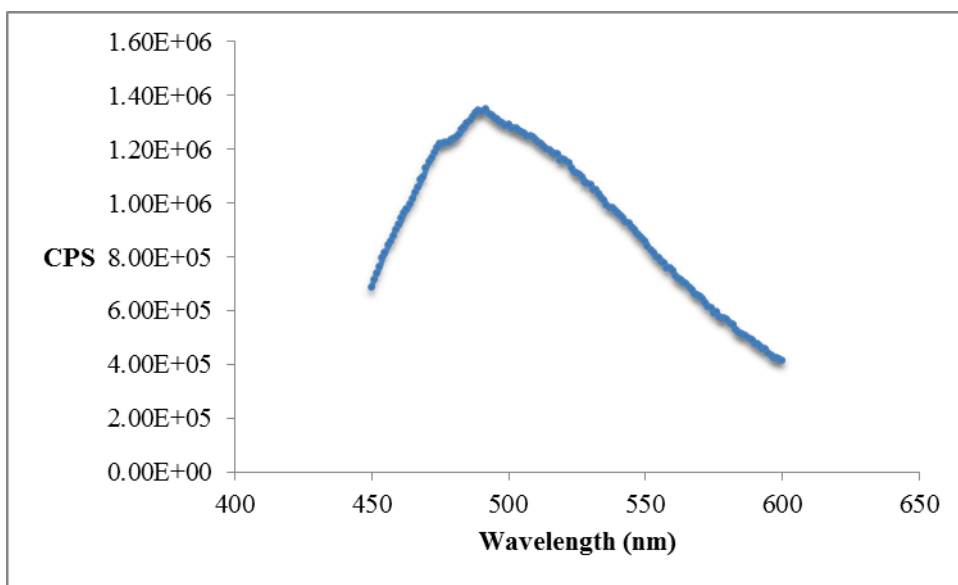

**Figure S25.** Emission spectrum of **3'** via excitation at 425 nm (MeCN).

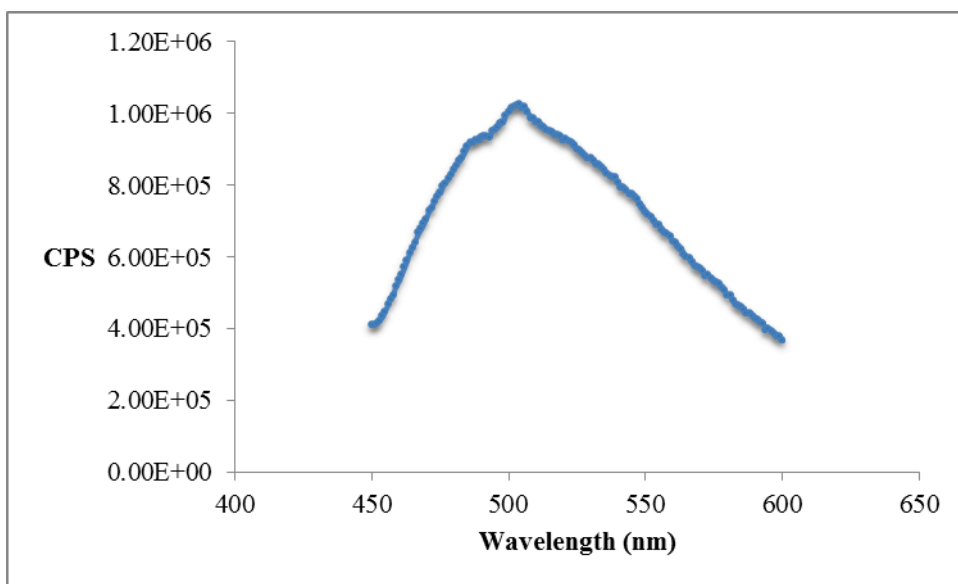

**Figure S26.** Emission spectrum of **3'** via excitation at 435 nm (MeCN).

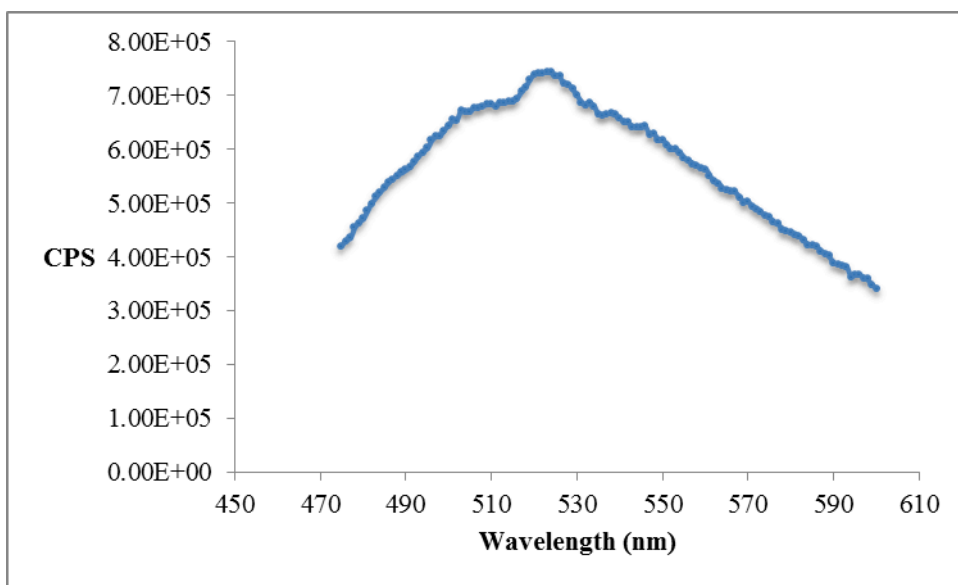

**Figure S27.** Emission spectrum of **3'** via excitation at 450 nm (MeCN).

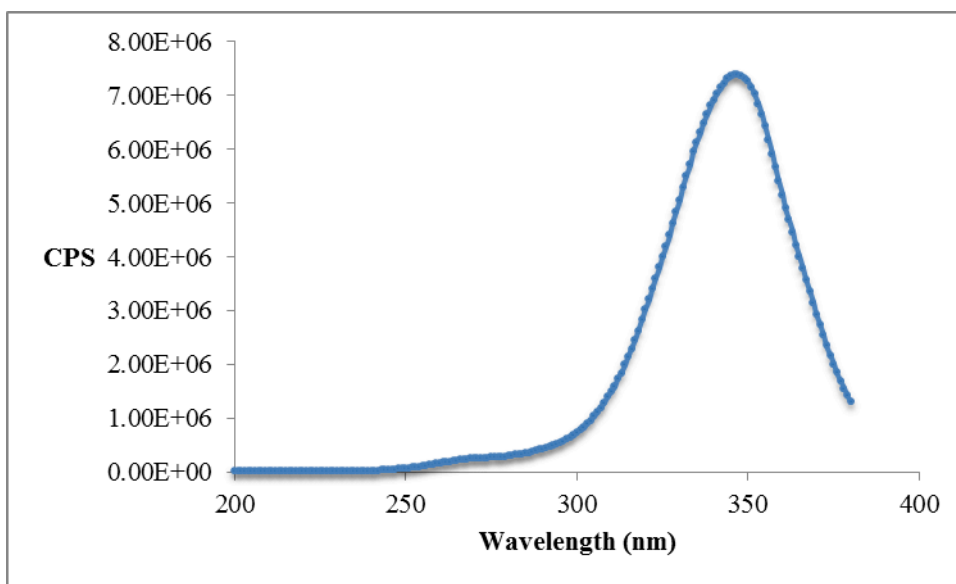

**Figure S28.** Excitation spectrum of 3' (MeCN). Detection at 400 nm

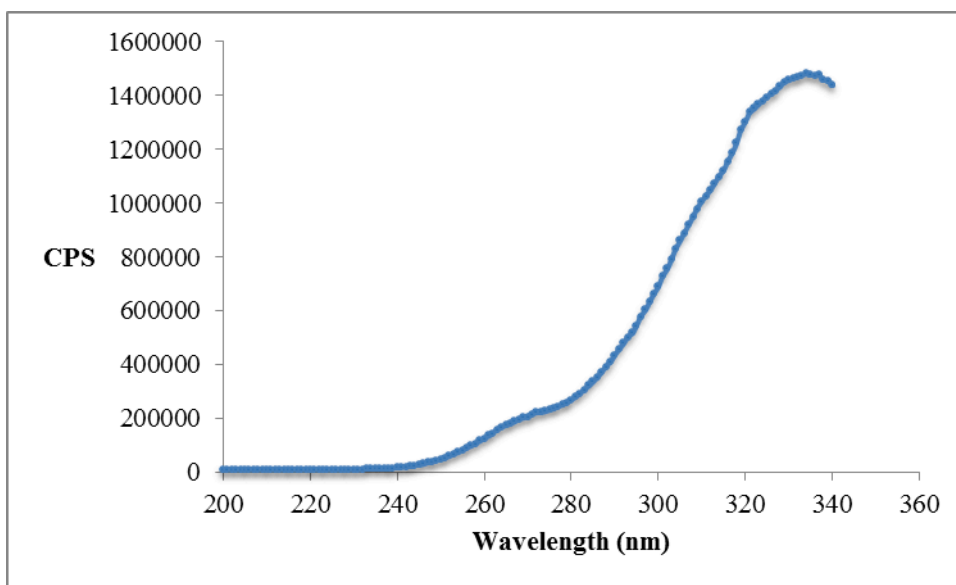

**Figure S29.** Excitation spectrum of 3' (MeCN). Detection at 345 nm.

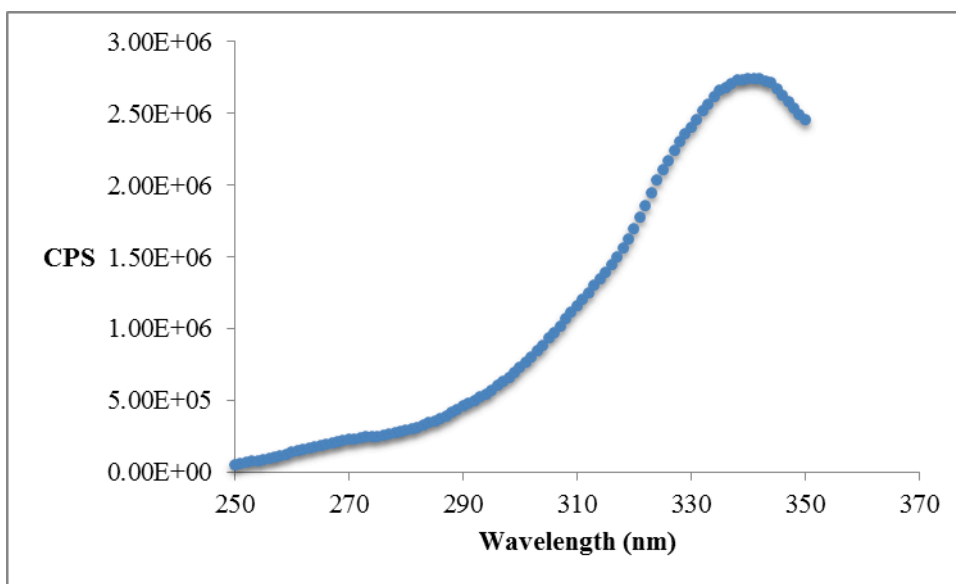

**Figure S30.** Excitation spectrum of **3'** (MeCN). Detection at 394 nm.

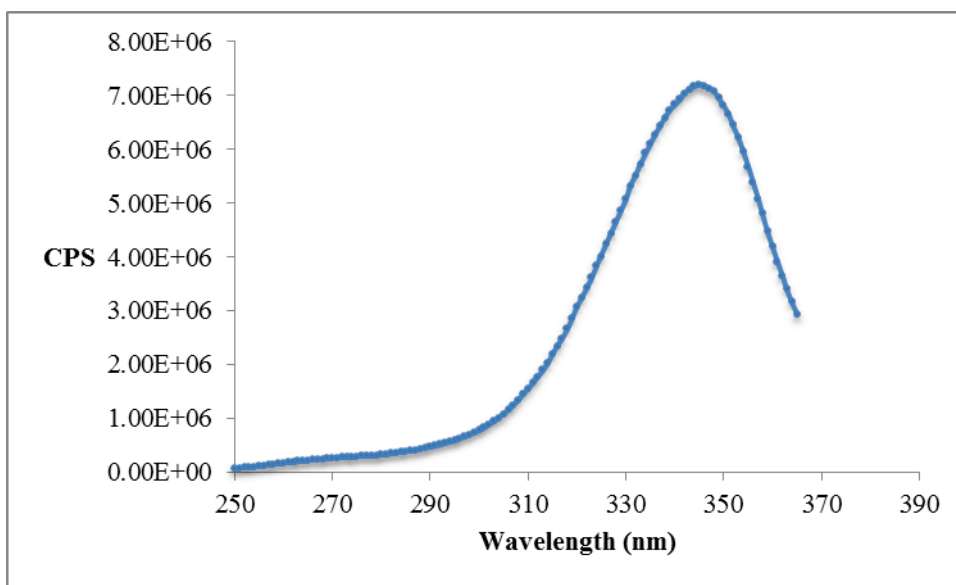

**Figure S31.** Excitation spectrum of **3'** (MeCN). Detection at 399 nm.

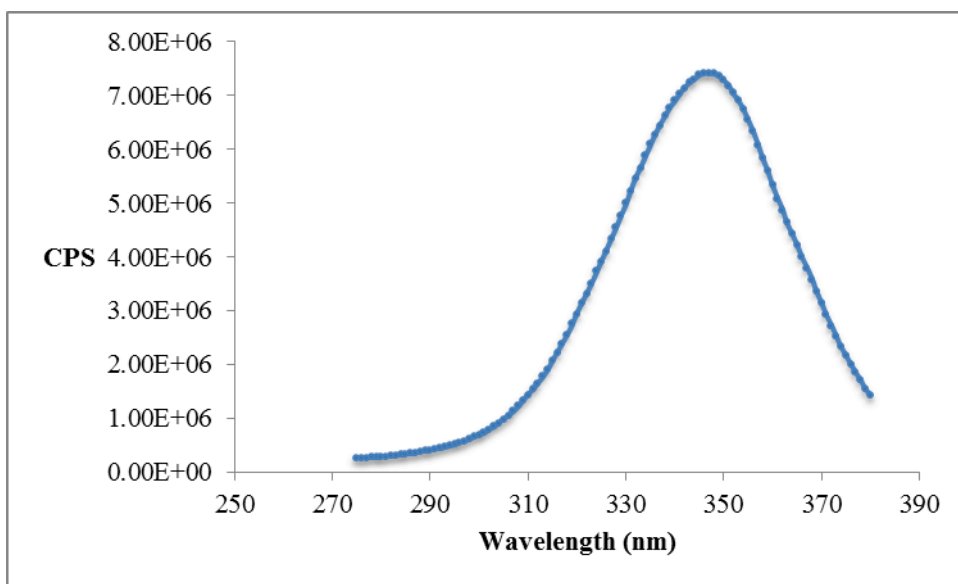

**Figure S32.** Excitation spectrum of **3'** (MeCN). Detection at 408 nm.

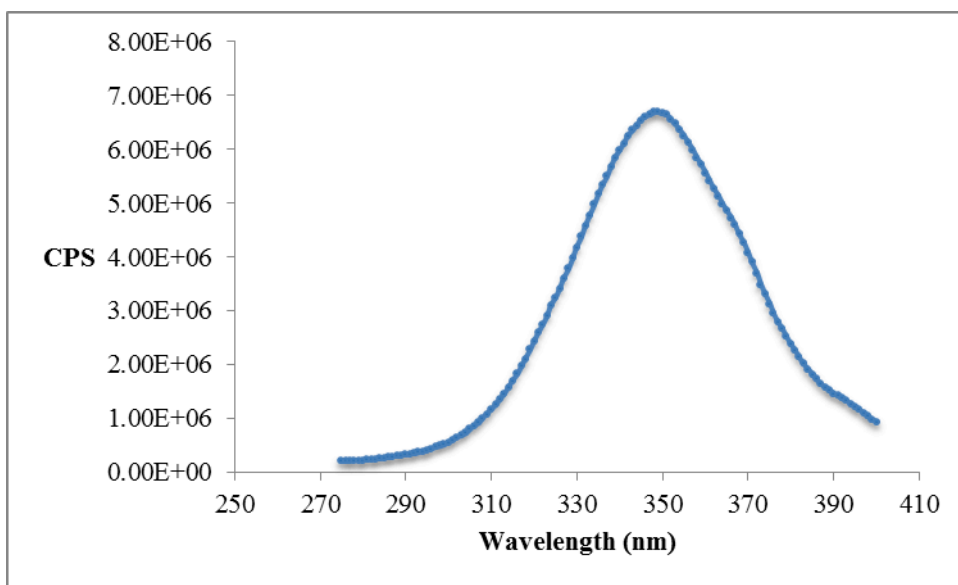

**Figure S33.** Excitation spectrum of **3'** (MeCN). Detection at 420 nm.

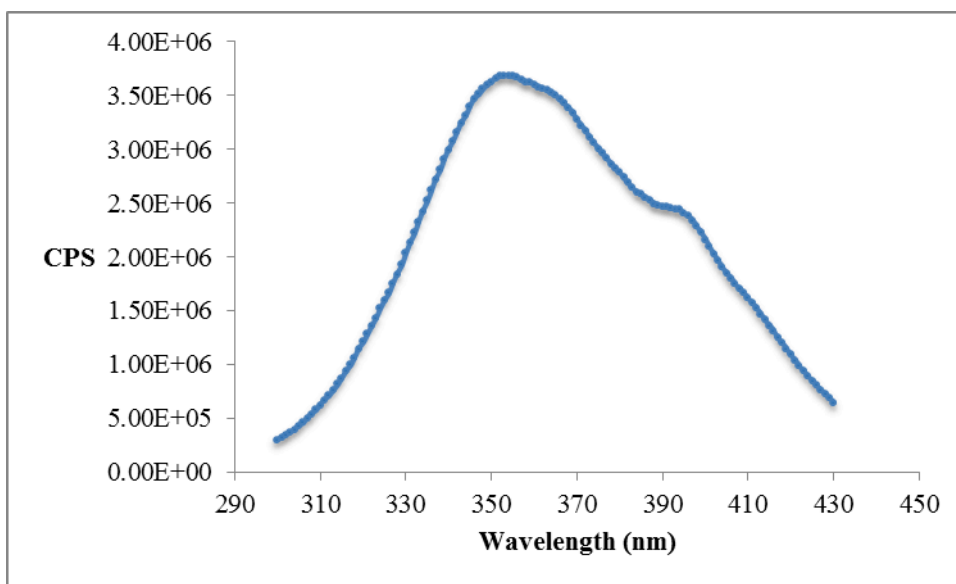

**Figure S34.** Excitation spectrum of **3'** (MeCN). Detection at 476 nm.

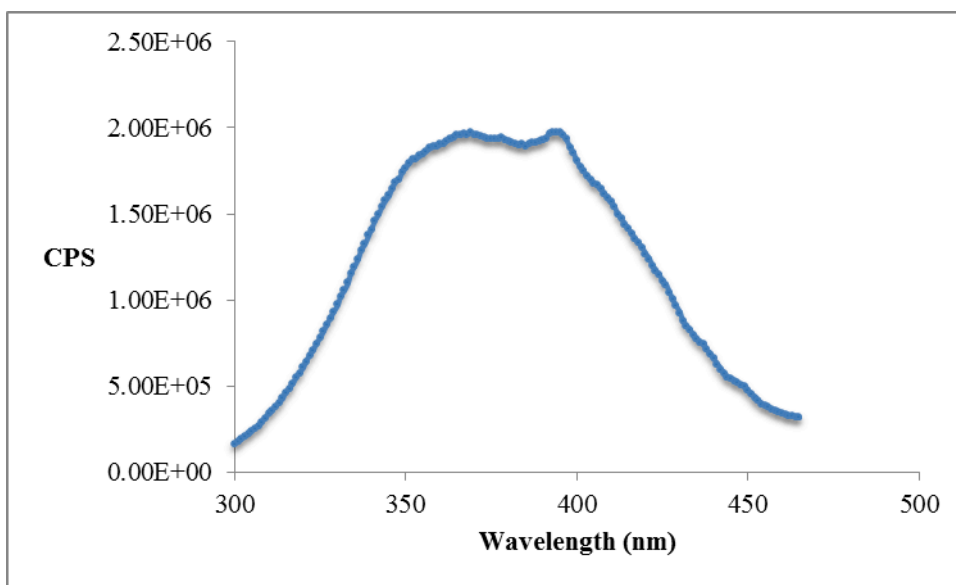

**Figure S35.** Excitation spectrum of **3'** (MeCN). Detection at 491 nm.



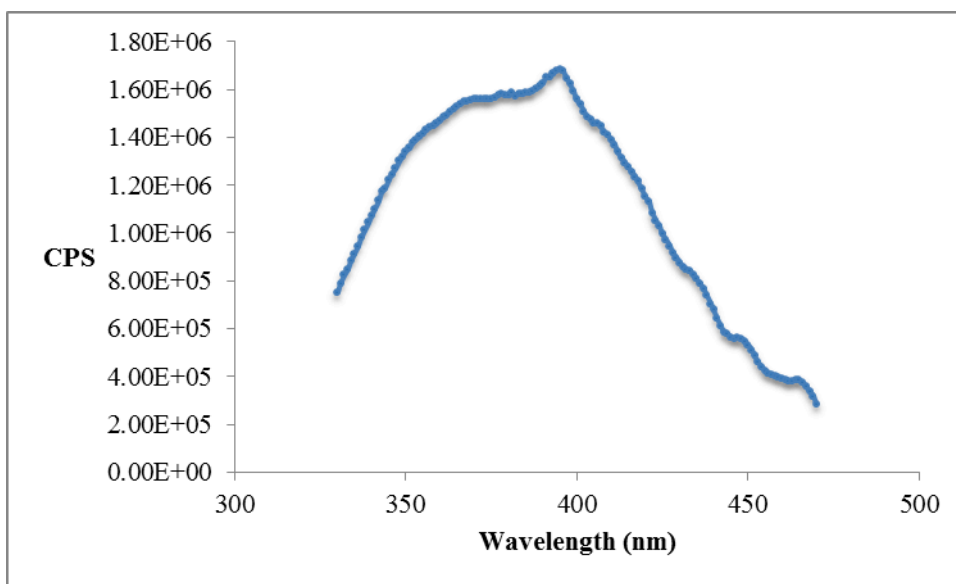

**Figure S36.** Excitation spectrum of **3'** (MeCN). Detection at 504 nm.

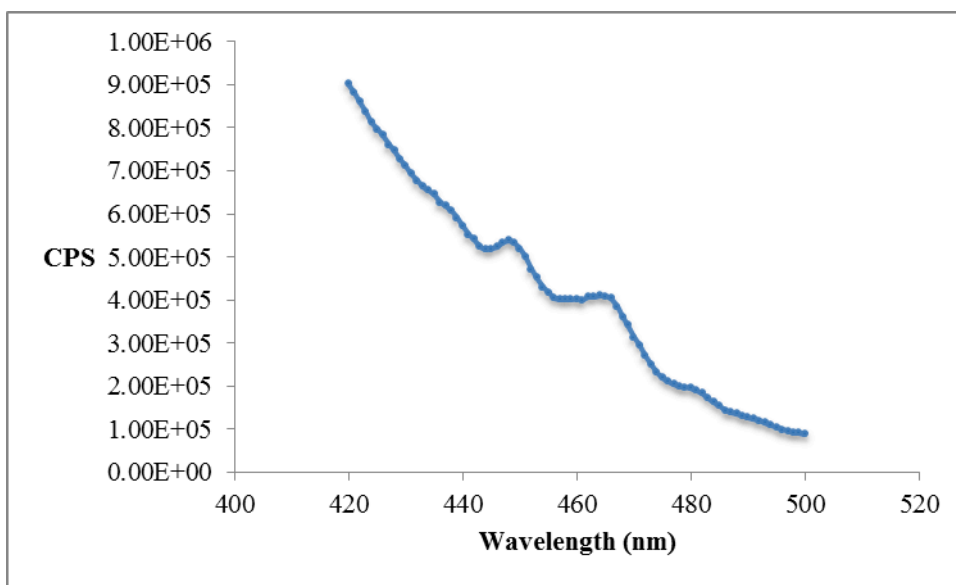

**Figure S37.** Excitation spectrum of **3'** (MeCN). Detection at 522 nm.

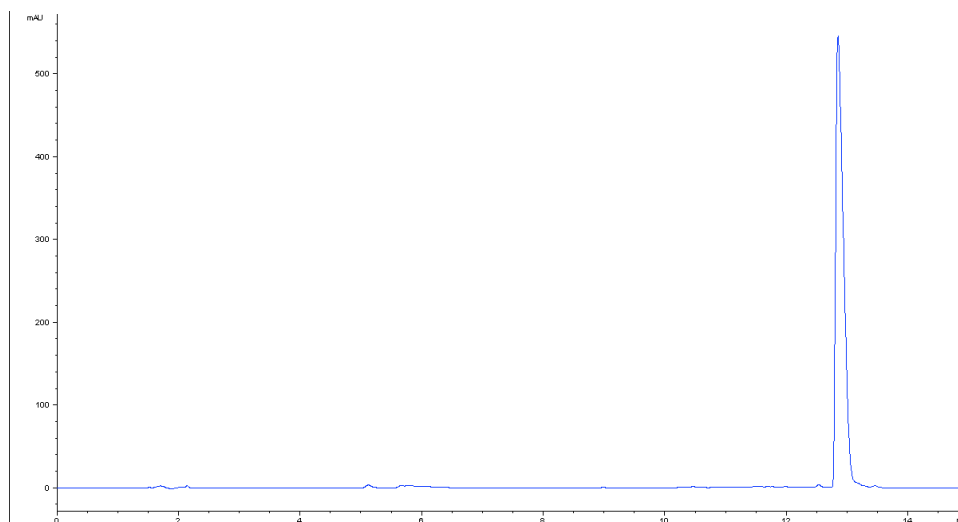

**Figure S38.** Chromatogram of **3'**; the peak at  $t_R$  13 minutes represents complex **3'** post irradiation in MeCN (UV 254 nm). No change was observed in purity or speciation as compared to Figure S5.

1. Gaussian 03, Revision D.01, M. J. Frisch *et al.*, Gaussian, Inc., Wallingford CT, 2004.
2. Gaussian09 Rev C.01, M. J. Frisch *et al.*, Gaussian, Inc., Wallingford CT, 2010.
3. a) A. D. Becke, J. Chem. Phys., 98 (1993) 5648-52. b) C. Lee, W. Yang, R. G. Parr, Phys. Rev. B, 37 (1988) 785-89.
4. P. J. Hay and W. R. Wadt, J. Chem. Phys., 82 (1985) 270-83.
5. a) R. Ditchfield, W. J. Hehre, and J. A. Pople, J. Chem. Phys., 54 (1971) 724. b) P. C. Hariharan and J. A. Pople, Theor. Chem. Acc., 28 (1973) 213-22. c) M. M. Francel, W. J. Pietro, W. J. Hehre, J. S. Binkley, D. J. DeFrees, J. A. Pople, and M. S. Gordon, J. Chem. Phys., 77 (1982) 3654-65. d) T. Clark, J. Chandrasekhar, G. W. Spitznagel, and P. v. R. Schleyer, J. Comp. Chem., 4 (1983) 294-301.
6. D. Andrae, U. Haeussermann, M. Dolg, H. Stoll, and H. Preuss, Theor. Chem. Acc., 77 (1990) 123-41.
7. J. Tomasi, B. Mennucci, and R. Cammi, Chem. Rev., 105 (2005) 2999-3093.
